# Supplementary material for: Early conversion to a CNI-free immunosuppression with SRL after renal transplantation—Long-term follow-up of a multicenter trial
Source: PLoS One. 2020 Aug 5;15(8):e0234396. doi: 10.1371/journal.pone.0234396 (PMC7406080; doi:10.1371/journal.pone.0234396)
Supplement: S2 File — (CSV) [file pone.0234396.s003.csv]

Treatment arm	Therapy discontinuation	TAC therapy duration (months)	Change to TAC	Reason for change category	Reason for change term
A:Srl	Yes	0	No
B:CsA	Yes	17.598684211	Yes	Rejection	Rejection
A:Srl	No	0	No
A:Srl	Yes	0	No
B:CsA	Yes	31.611842105	Yes	Deteriorating Tx function	Recurrence underlying disease
A:Srl	Yes	0	No
A:Srl	Yes	109.04605263	Yes	Rejection	Rejection
A:Srl	Yes	104.17763158	Yes	Miscellaneous	Pneumonitis
A:Srl	Yes	19.078947368	Yes	Miscellaneous	HLA-antibodies
A:Srl	Yes	94.309210526	Yes	Deteriorating Tx function	Fibrosis, progressive degenerati
B:CsA	No	0	No
B:CsA	No	0	No
B:CsA	No	0	No
A:Srl	Yes	18.914473684	Yes	Miscellaneous	HLA-antibodies
A:Srl	No	0	No
B:CsA	No	0	No
B:CsA	No	0	No
B:CsA	No	0	No
B:CsA	Yes	0	No
A:Srl	Yes	12.039473684	Yes	Miscellaneous	Pneumonitis
A:Srl	No	0	No
A:Srl	Yes	104.34210526	Yes	Miscellaneous	Pain lower legs
A:Srl	Yes	87.171052632	Yes	Deteriorating Tx function	Rising Creatinine
A:Srl	No	0	No
A:Srl	Yes	47.828947368	Yes	Deteriorating Tx function	Rising Creatinine
B:CsA	Yes	43.881578947	Yes	Rejection	Rejection
B:CsA	Yes	67.894736842	Yes	Miscellaneous	Diarrhea
B:CsA	Yes	0	No
A:Srl	Yes	0	No
B:CsA	No	0	No
B:CsA	No	0	No
A:Srl	Yes	99.703947368	Yes	Rejection	Rejection
B:CsA	No	0	No
B:CsA	No	0	No
B:CsA	Yes	26.842105263	Yes	Miscellaneous	Diarrhea
B:CsA	No	0	No
A:Srl	No	0	No
A:Srl	Yes	88.881578947	Yes	Miscellaneous	Hyperlipedemia
A:Srl	Yes	95.131578947	Yes	Miscellaneous	Leuco-/Thrombocytopenia
B:CsA	No	0	No
A:Srl	Yes	35.098684211	Yes	Deteriorating Tx function	unclear
A:Srl	No	0	No
A:Srl	Yes	77.796052632	Yes	Miscellaneous	Wound complications
B:CsA	No	0	No
B:CsA	No	0	No
B:CsA	No	0	No
B:CsA	No	0	No
A:Srl	Yes	0	No
B:CsA	No	0	No
B:CsA	Yes	66.184210526	Yes	Deteriorating Tx function	Recurrence underlying disease
A:Srl	Yes	96.513157895	Yes	Deteriorating Tx function	Recurrence underlying disease
A:Srl	No	0	No
A:Srl	No	0	No
B:CsA	No	0	No
A:Srl	No	0	No
A:Srl	No	0	No
A:Srl	Yes	57.861842105	Yes	Miscellaneous	Wound complications
B:CsA	No	0	No
A:Srl	Yes	83.322368421	Yes	Deteriorating Tx function	Rising Creatinine
B:CsA	No	0	No
B:CsA	Yes	93.453947368	Yes	Deteriorating Tx function	Rising Creatinine
B:CsA	Yes	65.789473684	Yes	Deteriorating Tx function	unclear
A:Srl	No	0	No
B:CsA	No	0	No
A:Srl	No	0	No
A:Srl	Yes	0	No
B:CsA	Yes	0	No
A:Srl	Yes	42.664473684	Yes	Deteriorating Tx function	Proteinuria
B:CsA	No	0	No
A:Srl	Yes	93.355263158	Yes	Deteriorating Tx function	Rising Creatinine
A:Srl	Yes	78.322368421	Yes	Miscellaneous	Pain lower legs
